# Supplementary material
Source: publisher figshare collection journal article supplement (https://sage.figshare.com/ndownloader/files/20186397)
Supplement: Supplementary file 1 [file 20186397]

Supplementary Table 1. Missing data analysis comparing those with complete data to those excluded due to missing data on covariates.

|  | Variable | Complete cases | | Cases with missing data on covariates | *p-*value |
| --- | --- | --- | --- | --- | --- |
|  |  | Mean (SD) | | Mean (SD) |  |
| Age 6/7 |  |  | |  |  |
|  | Positive parenting | 13.22 (2.60) | | 13.34 (2.84) | 0.074 |
|  | Harsh parenting | 8.76 (1.93) | | 8.65 (2.09) | 0.024 |
|  | Depression/Anxiety | 3.25 (2.74) | | 3.27 (2.69) | 0.836 |
|  | Hyperactivity | 3.85 (2.80) | | 3.99 (2.83) | 0.095 |
|  | Conduct disorder | 1.08 (1.75) | | 1.14 (1.75) | 0.266 |
|  | Social aggression | 1.43 (1.75) | | 1.34 (1.70) | 0.072 |
| Age 8/9 |  |  | |  |  |
|  | Positive parenting | 12.35 (2.59) | | 12.68 (2.80) | <0.0001 |
|  | Harsh parenting | 7.60 (2.71) | | 7.59 (2.75) | 0.887 |
|  | Depression/Anxiety | 3.34 (2.81) | | 3.42 (2.83) | 0.331 |
|  | Hyperactivity | 3.96 (2.86) | | 4.07 (2.87) | 0.169 |
|  | Conduct disorder | 1.10 (1.77) | | 1.23 (1.82) | 0.005 |
|  | Social aggression | 1.47 (1.76) | | 1.45 (1.70) | 0.656 |
| Age 10/11 |  |  |  |  |  |
|  | Positive parenting | 11.86 (2.66) | | 12.12 (2.92) | <0.0001 |
|  | Harsh parenting | 6.89 (2.90) | | 7.17 (2.97) | <0.0001 |
|  | Depression/Anxiety | 3.35 (2.83) | | 3.45 (2.82) | 0.173 |
|  | Hyperactivity | 3.98 (2.90) | | 4.05 (2.91) | 0.324 |
|  | Conduct disorder | 1.13 (1.79) | | 1.22 (1.81) | 0.041 |
|  | Social aggression | 1.52 (1.78) | | 1.50 (1.74) | 0.655 |
